# Supplementary material for: RAB43 facilitates cross-presentation of cell-associated antigens by CD8α+ dendritic cells
Source: PubMed Central journal article supplement — J Exp Med. 2016 Dec 12;213(13):2871–83. doi: 10.1084/jem.20160597 (PMC5154939; doi:10.1084/jem.20160597), 2016-12-12
Supplement: JEM_20160597_sm.pdf [file JEM_20160597_sm.pdf]

SUPPLEMENTAL MATERIAL

Kretzer et al., <https://doi.org/10.1084/jem.20160597>

```

mRAB43 1 MAGP--GPGDQDEHYDFLFKLVLVGDA SVGKTCVVQRFKTGAF SARQGSGTIGV
hRAB43 1 MAGPGPGPGDPDEQYDFLFKLVLVGDA SVGKTCVVQRFKTGAF SERQGSGTIGV
      ****  ****  *:*****

mRAB43 54 DFTMKTLEIQGKRVKLQIWDTAGQERFRITITQSYYSANGAILAYDISKRSTF
hRab43 56 DFTMKTLEIQGKRVKLQIWDTAGQERFRITITQSYYSANGAILAYDITKRSSF
      *****;***:

mRAB43 107 LSVPHWIEDVRKYAGSNIVQLLIGNKSDLADFREVP LAEQA SLAEHYDILCAI
hRAB43 109 LSVPHWIEDVRKYAGSNIVQLLIGNKSDLSELREVSLAEQA SLAEHYDILCAI
      *****;:***,*****

mRAB43 160 ETSAKDSSNVEEAFTRVATELIMRHGGPMFSEKNTDHIQLDSKDIAESWGCGC
hRAB43 162 ETSAKDSSNVEEAFLRVATELIMRHGGPLFSEKSPDHIQLNSKDIGEGWGCGC
      *****;****,*****;****,* ,*****

```

Figure S1. **Sequence alignment of RAB43.** (A) Sequence alignment for mouse RAB43 (mRAB43) and human RAB43 (hRAB43). Conserved sequence (\*), conservative mutation (:), semiconservative mutation (.), and nonconservative mutation ( ) are shown.

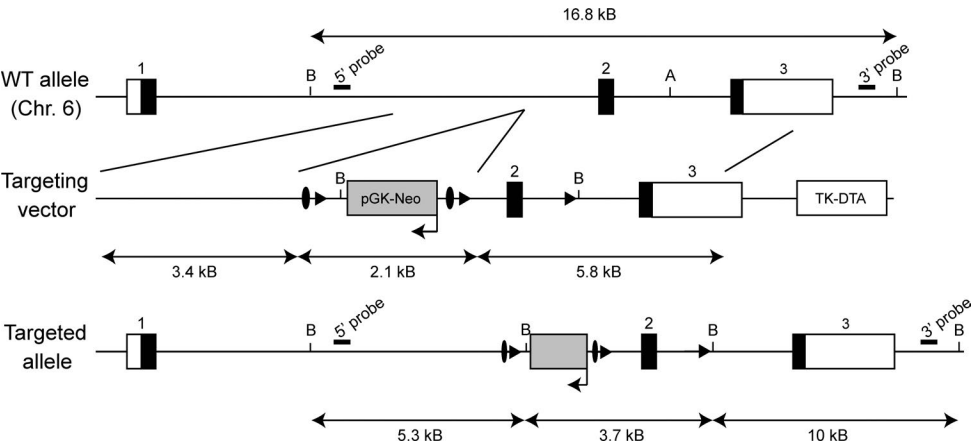

Figure S2. **Targeting strategy for *Rab43*<sup>CKO</sup>.** Shown are the *Rab43* genomic locus, targeting vector, and mutated allele before removal of the neomycin cassette (pGK-Neo). Exons are displayed as boxes with coding regions shaded. An orphan LoxP sequence was inserted at the *AccI* site (A). Correctly targeted alleles show a 5.3-kB band detected by the 5' probe and a 10-kB band detected by the 3' probe. Chr., chromosome; DTA, diphtheria toxin A expression cassette; TK, thymidine kinase promoter; triangles, LoxP sequences; ovals, FRT sequences.

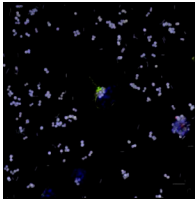

Video 1. **Localization of RAB43 after HKLM-OVA internalization.** Rotating Z stack of sorted SiglecH<sup>+</sup>CD11b<sup>+</sup>Sirpa<sup>+</sup>Bst2<sup>-</sup> cells from FLT3 cultures of WT B6 BM were incubated with Alexa Fluor 647-labeled HKLM-OVA (white) and were allowed to attach to coverslips, fixed, and stained for giantin (red) and RAB43 (green). Coverslips were attached to slides using ProLong Gold antifade with DAPI (blue).

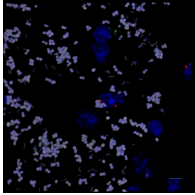

Video 2. **HKLM-OVA localization in RAB43-deficient DCs.** Rotating Z stack of sorted SiglecH<sup>+</sup>CD11b<sup>+</sup>Sirpa<sup>+</sup>Bst2<sup>-</sup> cells from FLT3 cultures of *Rab43*<sup>Δ/Δ</sup> B6 BM were incubated with Alexa Fluor 647-labeled HKLM-OVA (white) and were allowed to attach to coverslips, fixed, and stained for giantin (red) and RAB43 (green). Coverslips were attached to slides using ProLong Gold antifade with DAPI (blue).
